# Supplementary material for: Changes in prolonged sedentary behaviour across the transition to retirement
Source: HighWire-hosted journal article supplement (doi:10.1136/oemed-2020-106532), 2020-11-17
Supplement: oemed-2020-106532supp002_data_supplement.pdf [file oemed-2020-106532supp002_data_supplement.pdf]

**Supplementary Table 2.** Changes in total daily sedentary time, prolonged ( $\geq 30$  min) and highly prolonged ( $\geq 60$  min) sedentary time before and after the transition to retirement by gender and occupational status.

|                                      |                         | Women                |                      |                        | Men                  |                      |                        |
|--------------------------------------|-------------------------|----------------------|----------------------|------------------------|----------------------|----------------------|------------------------|
|                                      |                         | Before retirement    | After retirement     | Change                 | Before retirement    | After retirement     | Change                 |
|                                      |                         | Mean (h)<br>(95% CI) | Mean (h)<br>(95% CI) | Mean (min)<br>(95% CI) | Mean (h)<br>(95% CI) | Mean (h)<br>(95% CI) | Mean (min)<br>(95% CI) |
| Total                                | All <sup>a</sup>        | 8.4 (8.2 to 8.5)     | 8.7 (8.6 to 8.9)     | 22 (13 to 31)          | 9.8 (9.5 to 10.1)    | 9.6 (9.3 to 9.9)     | -12 (-31 to 6)         |
|                                      | Manual <sup>b</sup>     | 7.7 (7.4 to 7.9)     | 8.6 (8.3 to 8.8)     | 56 (42 to 70)          | 9.0 (8.4 to 9.6)     | 8.9 (8.3 to 9.5)     | -8 (-40 to 25)         |
|                                      | Non-manual <sup>b</sup> | 8.7 (8.5 to 8.8)     | 8.8 (8.6 to 9.0)     | 7 (-3 to 18)           | 10.2 (9.8 to 10.5)   | 9.9 (9.6 to 10.3)    | -13 (-34 to 8)         |
| Prolonged<br>( $\geq 30$ min)        | All <sup>a</sup>        | 1.7 (1.6 to 1.9)     | 2.3 (2.2 to 2.4)     | 34 (27 to 42)          | 2.6 (2.3 to 2.8)     | 2.8 (2.5 to 3.0)     | 12 (-3 to 27)          |
|                                      | Manual <sup>b</sup>     | 1.6 (1.4 to 1.8)     | 2.3 (2.1 to 2.5)     | 46 (34 to 58)          | 2.0 (1.6 to 2.5)     | 2.5 (2.0 to 3.0)     | 25 (-2 to 52)          |
|                                      | Non-manual <sup>b</sup> | 1.8 (1.7 to 2.0)     | 2.3 (2.2 to 2.5)     | 29 (21 to 38)          | 2.8 (2.5 to 3.1)     | 2.9 (2.6 to 3.2)     | 8 (-10 to 25)          |
| Highly prolonged<br>( $\geq 60$ min) | All <sup>a</sup>        | 0.6 (0.5 to 0.6)     | 0.8 (0.8 to 0.9)     | 15 (11 to 20)          | 0.9 (0.8 to 1.1)     | 1.0 (0.9 to 1.2)     | 5 (-4 to 15)           |
|                                      | Manual <sup>b</sup>     | 0.6 (0.5 to 0.7)     | 0.9 (0.8 to 1.0)     | 18 (11 to 26)          | 0.8 (0.5 to 1.0)     | 0.9 (0.6 to 1.2)     | 7 (-11 to 24)          |
|                                      | Non-manual <sup>b</sup> | 0.6 (0.5 to 0.7)     | 0.8 (0.8 to 1.0)     | 14 (9 to 20)           | 1.0 (0.8 to 1.1)     | 1.1 (0.9 to 1.2)     | 5 (-6 to 16)           |

Notes: <sup>a</sup> Adjusted for age, occupational status, wake wear time, smoking, body mass index, number of chronic diseases and mobility limitation.

<sup>b</sup> Adjusted for age, wake wear time, smoking, body mass index, number of chronic diseases and mobility limitation.

h=hours, min=minutes, CI = confidence interval.

P values for interaction time\*gender for total, prolonged and highly prolonged sedentary time: <.001, 0.006 and 0.05, occupation\*time: women: <.0001, 0.01, 0.35, men: 0.52, 0.32, 1.0.
